# Supplementary material for: Assessing the Italian Version of the Respiratory Symptom Experience Scale (IT- RSES) in Smokers and Former Smoker: A Validation Study
Source: Research Square preprint supplement (doi:10.21203/rs.3.rs-5741921/v1), 2025-04-10
Supplement: Supplementary file 1 [file 5ab5ec30df04835a4a4d2fd0.docx]

**Supplemental Table 1.** Respiratory Symptom Experience Scale.

| **Instructions** |
| --- |
| • For the following questions, please think about your experiences in the past 30 days |
| Response options (the same set of response options are presented with each item. See the Administration and Scoring section) |
| • Never (0 days out of the last 30 days) |
| • Rarely (1-5 days) |
| • Occasionally (6-15 days) |
| • Most days (16-29 days) |
| • Every day (all 30 days out of the last 30 days) |
| Item 1: morning cough |
| • Morning cough with phlegm or mucus |
| Item 2: cough frequently |
| • Cough frequently throughout the day |
| Item 3: shortness of breath |
| • My shortness of breath makes it difficult to do normal daily activities such as walking up a flight of stairs or carrying a heavy object |
| Item 4: easily winded |
| • Becoming easily winded during normal daily activities (eg, doing laundry and carrying groceries) |
| Item 5: wheezing |
| • Wheezing or whistling in your chest at times when you are not exercising or doing other physically strenuous daily activities (eg, while resting) |
