# Supplementary material for: Assessing the Italian Version of the Respiratory Symptom Experience Scale (IT- RSES) in Smokers and Former Smoker: A Validation Study
Source: Research Square preprint supplement (doi:10.21203/rs.3.rs-5741921/v1), 2025-04-10
Supplement: Supplementary file 2 [file 9efa18db4ac210ed8ff58dcd.docx]

**Supplementary Table 3.** Adjusted and Unadjusted RSES Scores Across Tobacco Use Categories.
