# Supplementary material for: Assessing the Italian Version of the Respiratory Symptom Experience Scale (IT- RSES) in Smokers and Former Smoker: A Validation Study
Source: Research Square preprint supplement (doi:10.21203/rs.3.rs-5741921/v1), 2025-04-10
Supplement: Supplementary file 3 [file a8e294e944dbb9634680df33.docx]

Supplemental Table 2. Comparison of the 5-items of the original tool with those used in the Italian version.

| **Item** | **Original tool (RSES)** | **Italian version (IT-RSES)** |
| --- | --- | --- |
| 1  2  3  4  5 | Morning cough with phlegm or mucus  Cough frequently throughout the day  My shortness of breath makes it difficult to do normal daily activities such as walking up a flight of stairs or carrying a heavy object  Becoming easily winded during normal daily activities (eg, doing laundry and carrying groceries)  Wheezing or whistling in your chest at times when you are not exercising or doing other physically strenuous daily activities (eg, while resting) | Ho tosse mattutina con catarro o muco  Tossisco frequentemente durante la giornata  Il mio fiato corto rende difficile svolgere le normali attività quotidiane, come salire una rampa di scale o trasportare un oggetto pesante  Rimango facilmente senza fiato durante le normali attività quotidiane (ad esempio fare il bucato o portare la spesa)  A volte sento un sibilo o un fischio nel petto quando non sto facendo esercizio fisico o altre attività quotidiane fisicamente faticose (ad esempio, a riposo). |
